# Supplementary material for: Design and Synthesis of N-Doped Carbons as Efficient Metal-Free Catalysts in the Hydrogenation of 1-Chloro-4-Nitrobenzene
Source: MDPI journal article supplement (doi:10.3390/ijms25052515), 2024-02-21
Supplement: s1 [file s1]

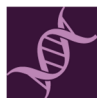

Article

# Design and Synthesis of N-Doped Carbons as Efficient Metal-Free Catalysts in the Hydrogenation of 1-Chloro-4-Nitrobenzene

Juan-José Villora-Picó, Antonio Sepúlveda-Escribano and M. Mercedes Pastor-Blas \*

Laboratory of Advanced Materials, Department of Inorganic Chemistry—University Institute of Materials of Alicante, University of Alicante, P.O. Box 99, E-03080 Alicante, Spain

\* Correspondence: M. Mercedes Pastor-Blas E-mail address: mercedes.pastor@ua.es Phone: +34-965903400.

**Supplementary Materials:****Table S1.** Relative percentages obtained from the deconvolution of the XPS high resolution N1s spectra of melamine-citrate carbons obtained after pyrolysis at 750 °C of different mixtures of melamine-citrate.

| Sample            | Energy (eV) | Species    | at. % | %  |
|-------------------|-------------|------------|-------|----|
| <b>MelCit 4:1</b> | 398.22      | Pyridinic  | 14.27 | 62 |
|                   | 400.01      | Pyrrolic   | 8.37  | 36 |
|                   | 401.58      | Quaternary | 0.48  | 2  |
| <b>MelCit 3:1</b> | 398.16      | Pyridinic  | 11.86 | 58 |
|                   | 399.96      | Pyrrolic   | 8.72  | 42 |
| <b>MelCit 2:1</b> | 398.24      | Pyridinic  | 13.23 | 52 |
|                   | 400.01      | Pyrrolic   | 10.72 | 42 |
|                   | 401.23      | Quaternary | 1.50  | 6  |
| <b>MelCit 1:1</b> | 398.23      | Pyridinic  | 4.92  | 35 |
|                   | 400.07      | Pyrrolic   | 8.61  | 61 |
|                   | 401.74      | Quaternary | 0.61  | 4  |
| <b>MelCit 1:2</b> | 398.24      | Pyridinic  | 2.31  | 42 |
|                   | 400.03      | Pyrrolic   | 2.60  | 48 |
|                   | 401.18      | Quaternary | 0.54  | 10 |

**Table S2.** Relative percentages obtained from the deconvolution of the XPS high resolution O 1s spectra of melamine-citrate carbons obtained after pyrolysis at 750 °C of different mixtures of melamine-citrate.

| Sample     | Energy (eV) | Species | at. % | %  |
|------------|-------------|---------|-------|----|
| MelCit 4:1 | 531.28      | O=C     | 4.91  | 64 |
|            | 532.93      | O-C     | 2.82  | 36 |
| MelCit 3:1 | 531.20      | O=C     | 5.28  | 68 |
|            | 532.76      | O-C     | 2.49  | 32 |
| MelCit 2:1 | 531.11      | O=C     | 4.33  | 57 |
|            | 532.83      | O-C     | 2.79  | 36 |
|            | 533.93      | O-C=O   | 0.56  | 7  |
| MelCit 1:1 | 530.86      | O=C     | 4.52  | 60 |
|            | 532.51      | O-C     | 2.47  | 32 |
|            | 533.65      | O-C=O   | 0.59  | 8  |
| MelCit 1:2 | 531.23      | O=C     | 6.78  | 56 |
|            | 532.50      | O-C     | 3.71  | 30 |
|            | 533.91      | O-C=O   | 1.75  | 14 |

**Table S3.** Relative percentages obtained from the deconvolution of the XPS high resolution C 1s spectra of melamine-citrate carbons obtained after pyrolysis at 750 °C of different mixtures of melamine-citrate.

| Sample     | Energy (eV) | Species       | at. % | %  |
|------------|-------------|---------------|-------|----|
| MelCit 4:1 | 284.62      | C-C, C-H, C=C | 37.83 | 55 |
|            | 285.85      | C-N, C-O      | 22.15 | 32 |
|            | 287.17      | C=N, C=O      | 7.13  | 10 |
|            | 288.78      | COOH          | 2.03  | 3  |
| MelCit 3:1 | 284.57      | C-C, C-H, C=C | 33.62 | 49 |
|            | 285.71      | C-N, C-O      | 24.53 | 35 |
|            | 287.15      | C=N, C=O      | 8.01  | 12 |
|            | 288.9       | COOH          | 2.98  | 4  |
| MelCit 2:1 | 284.60      | C-C, C-H, C=C | 33.65 | 49 |
|            | 285.77      | C-N, C-O      | 16.53 | 24 |
|            | 286.99      | C=N, C=O      | 14.03 | 21 |
|            | 288.84      | COOH          | 4.22  | 6  |
| MelCit 1:1 | 284.64      | C-C, C-H, C=C | 52.45 | 67 |
|            | 285.91      | C-N, C-O      | 15.38 | 20 |
|            | 287.28      | C=N, C=O      | 7.39  | 9  |
|            | 288.73      | COOH          | 2.81  | 4  |
| MelCit 1:2 | 284.62      | C-C, C-H, C=C | 54.14 | 68 |
|            | 285.78      | C-N, C-O      | 19.71 | 25 |
|            | 287.42      | C=N, C=O      | 4.44  | 5  |
|            | 289.00      | COOH          | 1.54  | 2  |

**Table S4.** Relative percentages obtained from the deconvolution of the XPS high resolution C 1s spectra of MelCit 2:1 carbons obtained after pyrolysis at different temperatures.

| Sample      | Energy (eV) | Species       | at. % | %  |
|-------------|-------------|---------------|-------|----|
| MelCit P500 | 284.56      | C-C, C-H, C=C | 8.76  | 18 |
|             | 286.22      | C-N, C-O      | 5.07  | 11 |
|             | 288.18      | C≡N-C         | 32.91 | 69 |
|             | 289.81      | COOH          | 0.70  | 2  |
| MelCit P600 | 284.64      | C-C, C-H, C=C | 11.33 | 23 |
|             | 286.23      | C-N, C-O      | 8.47  | 17 |
|             | 288.13      | C≡N-C         | 29.15 | 60 |
| MelCit P700 | 284.58      | C-C, C-H, C=C | 20.90 | 37 |
|             | 285.93      | C-N, C-O      | 8.45  | 15 |
|             | 287.21      | C≡N-C, C=O    | 23.04 | 40 |
|             | 288.86      | COOH          | 4.46  | 8  |
| MelCit P750 | 284.60      | C-C, C-H, C=C | 33.65 | 49 |
|             | 285.77      | C-N, C-O      | 16.53 | 24 |
|             | 286.99      | C=N, C=O      | 14.03 | 21 |
|             | 288.84      | COOH          | 4.22  | 6  |
| MelCit P800 | 284.59      | C-C, C-H, C=C | 45.97 | 62 |
|             | 286.05      | C-N, C-O      | 21.05 | 28 |
|             | 287.92      | C=N, C=O      | 5.65  | 8  |
|             | 289.61      | COOH          | 1.88  | 2  |
| MelCit P850 | 284.58      | C-C, C-H, C=C | 52.49 | 67 |
|             | 285.98      | C-N, C-O      | 20.07 | 26 |
|             | 287.68      | C=N, C=O      | 4.21  | 5  |
|             | 288.84      | COOH          | 1.33  | 2  |
| MelCit P900 | 284.60      | C-C, C-H, C=C | 54.78 | 67 |
|             | 285.81      | C-N, C-O      | 14.83 | 18 |
|             | 286.96      | C=N, C=O      | 8.81  | 11 |
|             | 288.96      | COOH          | 3.13  | 4  |
| MelCit P950 | 284.63      | C-C, C-H, C=C | 67.00 | 75 |
|             | 285.83      | C-N, C-O      | 9.93  | 11 |
|             | 286.74      | C=N, C=O      | 9.52  | 11 |
|             | 288.71      | COOH          | 2.57  | 3  |

**Table S5.** Relative percentages obtained from the deconvolution of the XPS high resolution N 1s spectra of MelCit 2:1 carbons obtained after pyrolysis at different temperatures.

| Sample      | Energy (eV) | Species    | at. % | %  |
|-------------|-------------|------------|-------|----|
| MelCit P500 | 398.78      | C≡N-C      | 35.13 | 71 |
|             | 400.40      | Pyrrolic   | 11.05 | 23 |
|             | 401.47      | Quaternary | 2.11  | 4  |
|             | 404.38      | N-oxide    | 0.97  | 2  |
| MelCit P600 | 398.57      | C≡N-C      | 29.02 | 65 |
|             | 400.27      | Pyrrolic   | 15.88 | 35 |
| MelCit P700 | 398.31      | Pyridinic  | 21.49 | 60 |
|             | 400.09      | Pyrrolic   | 14.42 | 40 |
| MelCit P750 | 398.24      | Pyridinic  | 13.23 | 52 |
|             | 400.01      | Pyrrolic   | 10.72 | 42 |
|             | 401.23      | Quaternary | 1.50  | 6  |
| MelCit P800 | 398.11      | Pyridinic  | 9.25  | 50 |
|             | 399.91      | Pyrrolic   | 8.05  | 43 |
|             | 401.26      | Quaternary | 1.25  | 7  |
| MelCit P850 | 398.12      | Pyridinic  | 8.21  | 53 |
|             | 399.97      | Pyrrolic   | 6.48  | 42 |
|             | 401.52      | Quaternary | 0.72  | 5  |
| MelCit P900 | 398.12      | Pyridinic  | 5.19  | 49 |
|             | 399.83      | Pyrrolic   | 3.86  | 40 |
|             | 401.14      | Quaternary | 1.17  | 11 |
| MelCit P950 | 398.19      | Pyridinic  | 2.83  | 48 |
|             | 399.87      | Pyrrolic   | 2.48  | 40 |
|             | 401.3       | Quaternary | 0.87  | 12 |

**Table S6.** Conversion (%) vs time during the five cyclic experiments showing the reusability of Mel-Cit P850 carbon in the hydrogenation of 1-chloro-4-nitrobenzene.

| Time (min) | Cycle 1 | Cycle 2 | Cycle 3 | Cycle 4 | Cycle 5 |
|------------|---------|---------|---------|---------|---------|
| 0          | 0.78    | 0.58    | 0.32    | 0.15    | 0.22    |
| 15         | 4.00    | 1.50    | 1.40    | 1.28    | 0.10    |
| 30         | 5.97    | 3.62    | 3.25    | 2.95    | 2.53    |
| 60         | 10.53   | 5.27    | 4.12    | 4.35    | 4.57    |
| 120        | 17.87   | 10.17   | 8.23    | 8.10    | 7.98    |
| 180        | 22.51   | 15.63   | 12.54   | 10.92   | 11.02   |
| 300        | 30.97   | 25.24   | 22.13   | 20.12   | 19.85   |
| 360        | 35.27   | 29.52   | 26.32   | 25.12   | 24.98   |
| 480        | 44.40   | 39.25   | 35.41   | 34.23   | 33.12   |
| 600        | 54.48   | 49.32   | 46.85   | 43.68   | 41.95   |
| 900        | 75.32   | 65.45   | 62.12   | 58.21   | 55.23   |
| 1200       | 92.60   | 82.05   | 77.85   | 69.45   | 65.21   |
| 1440       | 100.00  | 91.45   | 85.63   | 77.19   | 72.85   |
| 1800       |         | 100.00  | 90.23   | 82.35   | 80.12   |

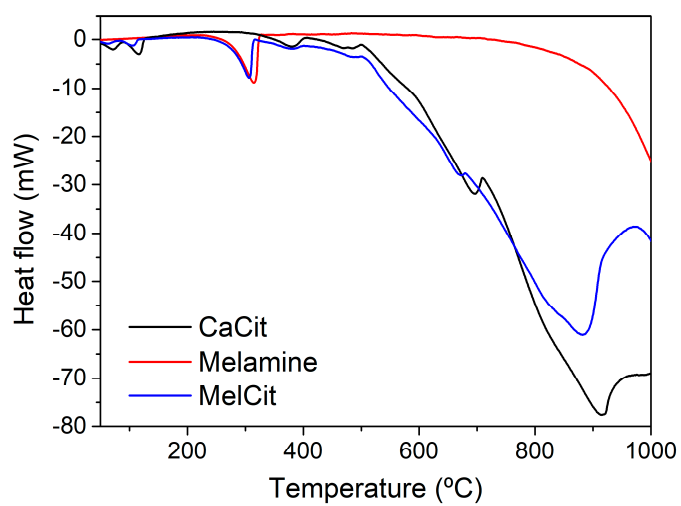

**Figure S1.** DSC profiles of calcium citrate tetrahydrate, melamine, and the corresponding physical mixture of both (2:1 w/w ratio). Heating rate: 5 °C/min; N<sub>2</sub> atmosphere.



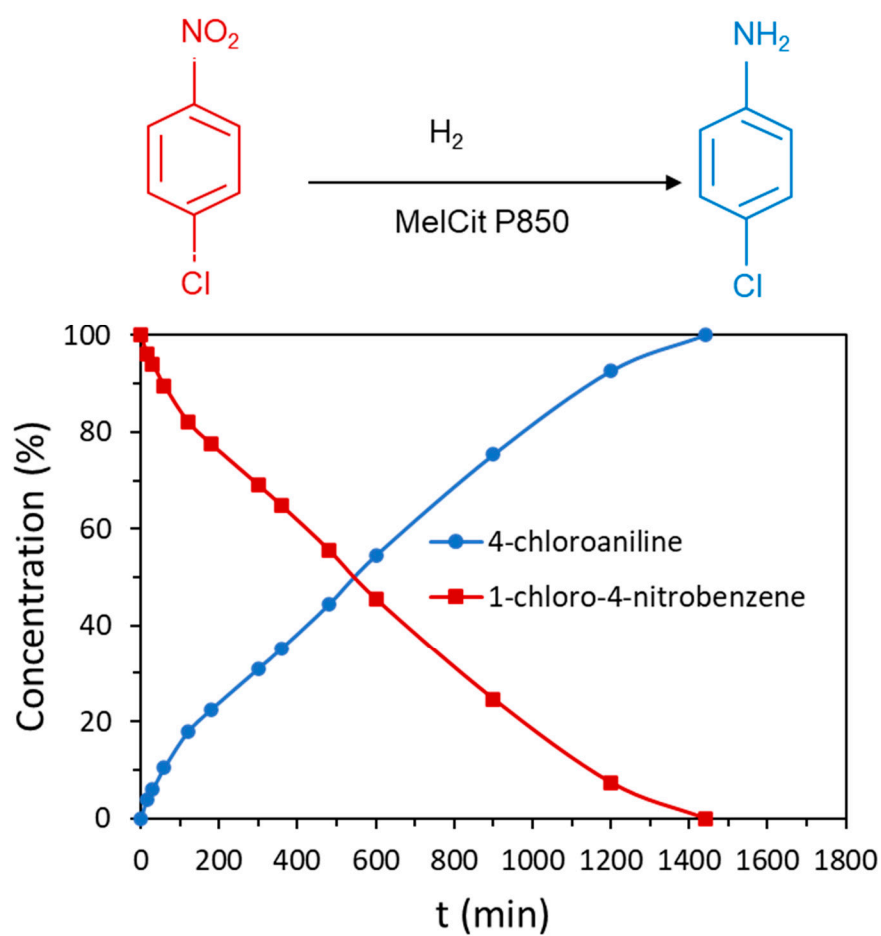

**Figure S2.** Evolution of compounds over the course of the hydrogenation reaction in the presence of MelCit P850 carbon.

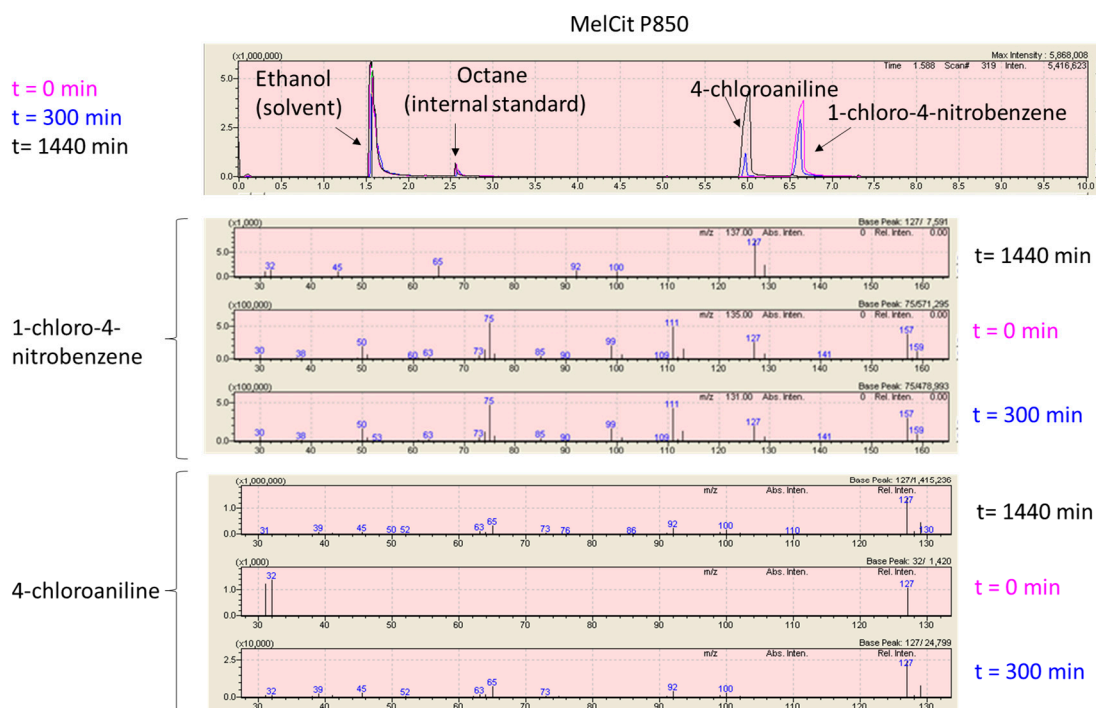

**Figure S3.** GC-MS analysis of compounds at t = 0 min, t = 300 min and t = 1440 min during the course of the hydrogenation reaction in the presence of MelCit P850 carbon.

(a)

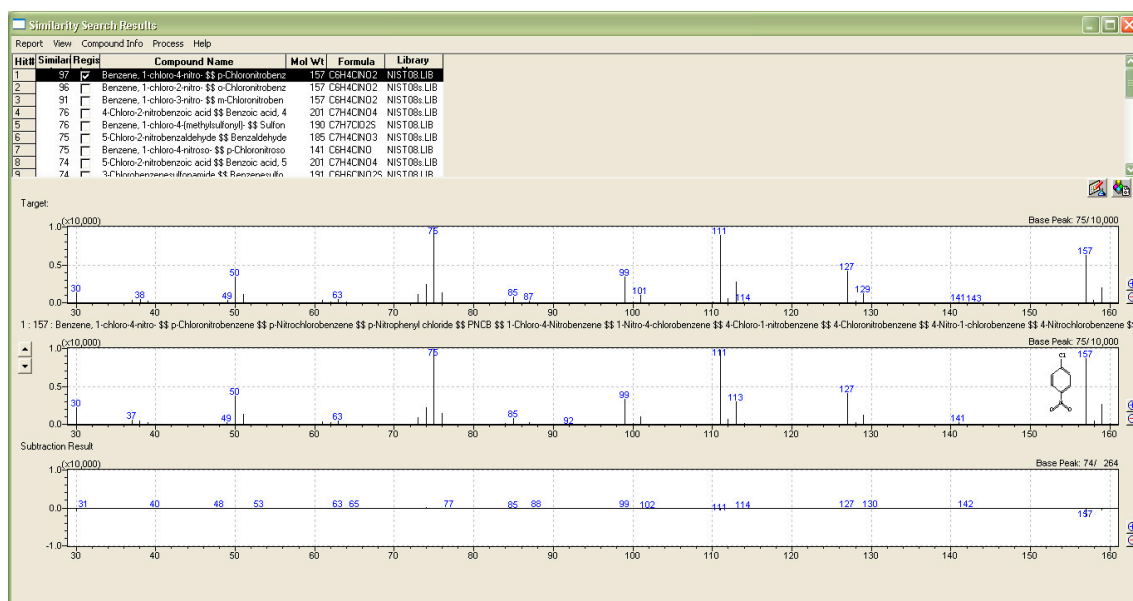

(b)

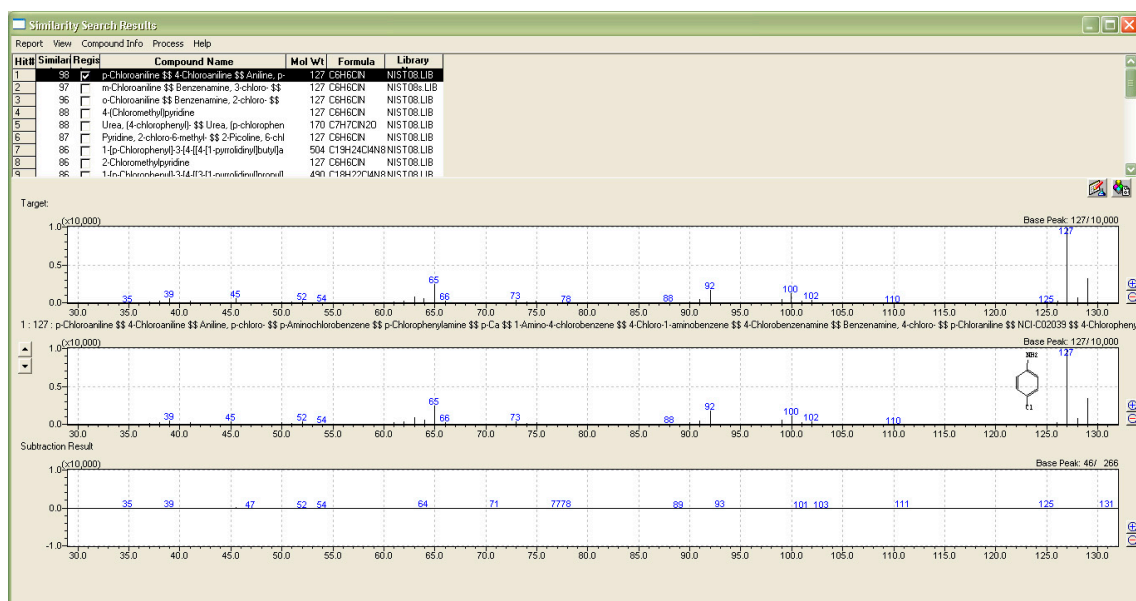

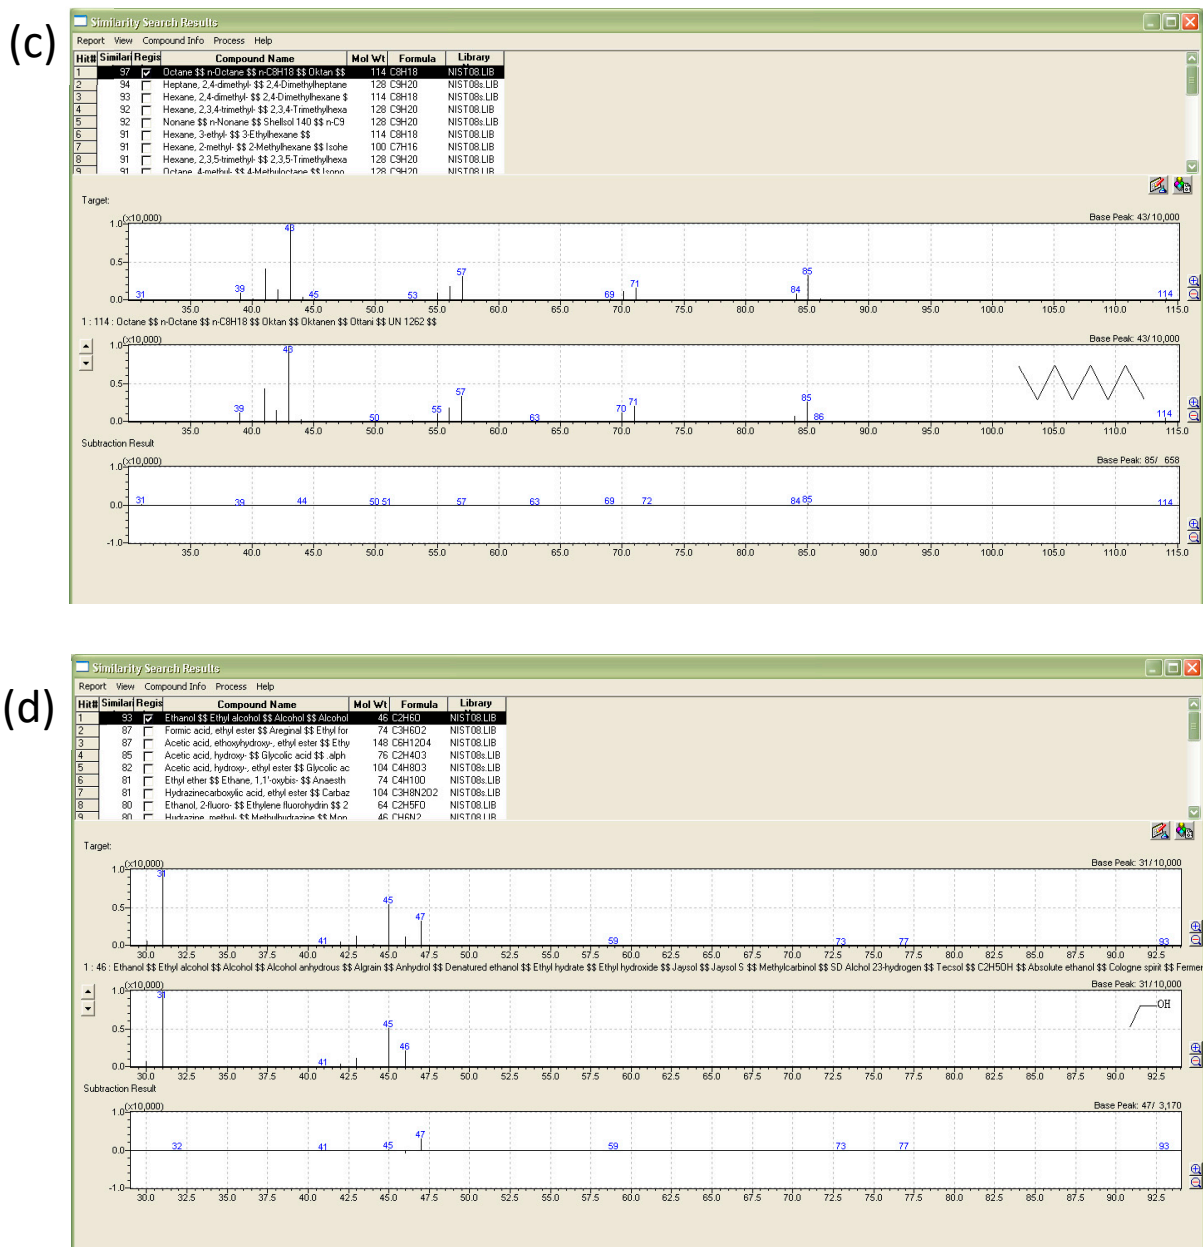

**Figure S4.** Mass spectra (MS) similarity search results of compounds detected during the course of the hydrogenation reaction in the presence of MelCit P850 carbon showing (a) 1-chloro-4-nitrobenzene, (b) 4-chloroaniline, (c) octane (internal standard) and (d) ethanol (solvent).
